# Supplementary material for: Iodine dissolution mechanisms in high-pressure aluminoborosilicate glasses and their relationship to oxygen speciation
Source: Royal Society of Chemistry journal article supplement (doi:10.1039/d3ta05344j), 2023-01-01
Supplement: d3ta05344j1.pdf [file d3ta05344j1.pdf]

1        **SUPPLEMENTARY MATERIAL: IODINE DISSOLUTION MECHANISMS IN**  
2        **HIGH-PRESSURE BOROSILICATE NUCLEAR WASTE GLASSES AND ITS**  
3        **RELATIONSHIP TO OXYGEN SPECIATION**

4        **Scanning/Transmission Electron Microscopy (S/TEM) acquisition in I-bearing glasses**

5        In order to investigate the presence of nanoparticles or nm-size bubbles filled with I<sub>2</sub> fluid in  
6        the glasses, we also conducted Scanning/Transmission Electron Microscopy (S/TEM) at 80  
7        kV on a Cs probe corrected Themis Z G3 (Thermo Fisher Scientific) using the High Angle  
8        Annular Dark Field (HAADF) detector (with 33-197° collection angle range) and the 4-SDD  
9        detectors (Super-X system) for EDS analysis. Samples were previously prepared by  
10       dispersing the grinded powder in ethanol and depositing a drop of this solution on a holey-  
11       carbon-coated copper grid.

12

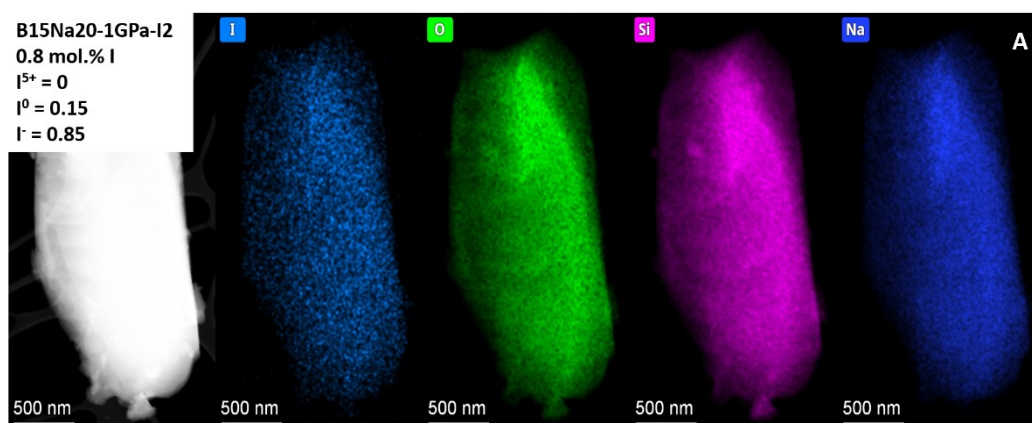

13

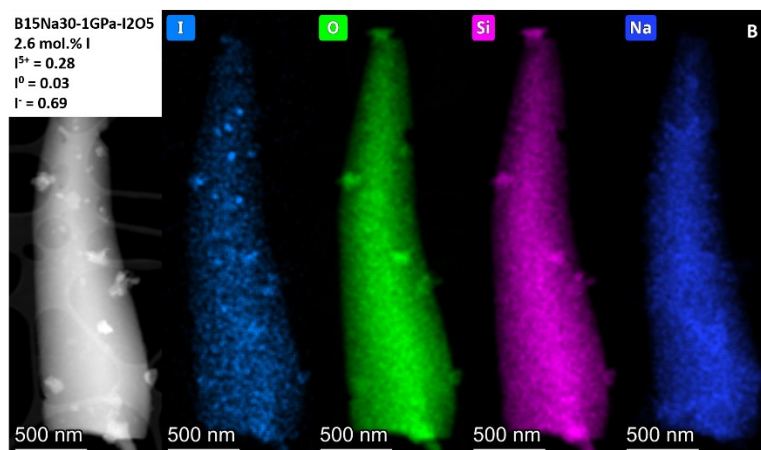

14 *Figure S1: S/TEM element imaging for B15Na20-1GPa-I2 (A) and for B15Na30-1GPa-I2O5*  
 15 *(B). For both samples, the element distribution is homogeneous at the  $\mu\text{m}$  scale. We suspect*  
 16 *the presence of nm-scale quenching crystal in B15Na30-1GPa-I2O5.*

17 The elemental maps (I, O, Si and Na) are shown in Figure S1 for B15Na20-1GPa-I2 (A) and  
 18 for B15Na30-1GPa-I2O5 (B). From the shown images, we observe that the obtained I-bearing  
 19 glasses are homogeneous with respect to element distribution at  $\mu\text{m}$  scale. Clearly, we do not  
 20 observe the presence of nm-scale bubble filled with solid I<sub>2</sub>. This suggests that the presence of  
 21 I<sup>0</sup> determined from XPS I 3d spectra corresponds to iodine dissolved within the glass structure  
 22 as I<sup>0</sup> and probably under I<sub>2</sub> cluster form.

23 Whereas the presence of quench crystals has been identified in B15Na30 glasses, in Figure  
 24 S1B, there is no clear evidence of large enriched iodine crystalline phases at the investigated  
 25 scale. This implies that the quench crystals are not highly represented in our quenched  
 26 samples.

| Oxides                         | B15Na20-1GPa-I2 |           | B15Na30-1GPa-I2O5 |          |
|--------------------------------|-----------------|-----------|-------------------|----------|
|                                | SEM EDS         | S/TEM     | SEM EDS           | S/TEM    |
| SiO <sub>2</sub> (mol.%)       | 62.6(2)         | 65.1(100) | 58.1(6)           | 58.6(31) |
| B <sub>2</sub> O <sub>3</sub>  | 14.2(1)         | 14.2(1)   | 14.1(1)           | 14.1(1)  |
| Al <sub>2</sub> O <sub>3</sub> | 6.0(1)          | 5.7(11)   | 6.2(1)            | 5.5(5)   |
| Na <sub>2</sub> O              | 18.4(3)         | 14.3(27)  | 26.0(7)           | 20.3(9)  |
| I                              | 0.8(2)          | 0.8(1)    | 2.6(2)            | 1.5(3)   |

27 *Table S1: Major element concentrations obtained by SEM EDS and S/TEM for B15Na20-*  
 28 *1GPa-I2 and for B15Na30-1GPa-I2O5. The error bars are determined from replicated*  
 29 *measurements for both methods. The I content derived by both analytical methods is roughly*  
 30 *consistent.*

31 The glass compositions have been obtained from the sample analyses in Figure S1. The  
 32 results are given in Table S1 and compared to the results obtained from SEM EDS  
 33 measurements. It should be pointed out that the error obtained on B15Na20-1GPa-I2 is based

34 on a single measurement whereas the error obtained on B15Na30-1GPa-I2O5 is based on four  
35 replicated measures. Although the error bars derived from the S/TEM are likely to be larger  
36 than SEM EDS ones, the measured mol.% oxides are consistent. The Na<sub>2</sub>O is systematically  
37 lower for S/TEM measurements than for SEM EDS. The derived iodine content in B15Na30-  
38 1GPa-I2O5 is lower by S/TEM than SEM EDS. This could be due to possible heterogeneity  
39 within this sample.

#### 40 **O 1s XPS fitting for B15Na20-1GPa-I2O5**

41 As mentioned in the manuscript, we have observed a very peculiar behavior for B15Na20-  
42 1GPa-I2O5. The O 1s XPS spectrum obtained for this sample is shown in Figure S2. If the  
43 spectrum simulation appears consistent with the general trend shown in Figure 4, the O 1s  
44 spectrum for B15Na20-1GPa-I2O5 departs from this trend. Clearly, there is a need for an  
45 additional peak to reproduce the entire spectrum. This peak is located at ~533 eV. It is not  
46 clear to which type of oxygen species this peak is attributed to. Malfait<sup>1</sup> suggested that at high  
47 binding energy, the peak could correspond to hydrated related species. Surprisingly, this  
48 sample is the only one to not show the presence of iodate species (I<sup>5+</sup>). It could be possible  
49 that the I<sub>2</sub>O<sub>5</sub> dissociation into I<sub>2</sub> and O<sub>2</sub> led to the incorporation of both I<sub>2</sub> as I<sup>-</sup> or I<sup>0</sup> and O<sub>2</sub>  
50 without the recombination into IO<sub>3</sub><sup>-</sup> clusters. The question remains to be clarified.

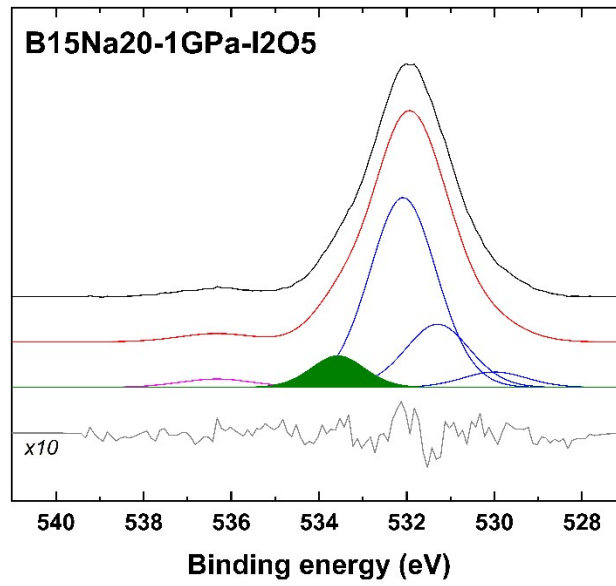

51

52 *Figure S2: Typical simulations for B15Na20-1GPa-I2O5 glass. The simulation for B15Na20-*  
53 *1GPa-I2O5 requires an additional peak located at >533 eV and possibly attributed to*  
54 *hydrated oxygen species.*

55

56 Reference:

57 [1] W. J. Malfait, *Can. J. Chem.*, 2015, **93**, 578-580.

58
